# Supplementary material for: Microwave-assisted synthesis of near-infrared fluorescent sphingosine derivatives
Source: Royal Society of Chemistry journal article supplement (doi:10.1039/b807930g), 2008-01-01
Supplement: b807930g.pdf [file b807930g.pdf]

## Microwave-assisted synthesis of near-infrared fluorescent sphingosine derivatives

Kumar R. Bhushan<sup>a</sup>, Fangbing Liu<sup>a</sup>, Preeti Misra<sup>a</sup>, and John V. Frangioni<sup>a,\*</sup>

<sup>a</sup>Division of Hematology/Oncology, Department of Medicine and Department of Radiology, Beth Israel Deaconess Medical Center/Harvard Medical School  
E-mail: [jfrangio@bidmc.harvard.edu](mailto:jfrangio@bidmc.harvard.edu); Homepage: <http://www.frangionilab.org>

### SUPPORTING INFORMATION

All chemicals and solvents were of American Chemical Society or high-performance liquid chromatography (HPLC) purity and were used as received. HPLC grade acetonitrile was purchased from VWR International (West Chester, PA, USA). HPLC grade water was from American Bioanalytic (Natick, MA, USA). All other chemicals were purchased from Fisher Scientific (Pittsburgh, PA, USA) and Sigma-Aldrich (Saint Louis, MO, USA).

**NMR:** All NMR measurements were performed on the Varian Unity INOVA 600 MHz vertical bore spectrometer using either 5 mm high-resolution probe. Samples were placed in 5 mm NMR tubes.

#### NMR and LCMS:

**Compound 2a:** <sup>1</sup>H NMR (CD<sub>3</sub>OD, 600 MHz):  $\tau$ /ppm 8.54 (s, 1H, NH), 8.05 (d, J=13.2 Hz, 2H, 2xCH), 7.37 (d, J=7.2 Hz, 2H, Ar-H), 7.30 (t, J=7.6 Hz, 2H, Ar-H), 7.09 (t, J=8.8 Hz, 4H, Ar-H), 5.87 (d, J=13.2 Hz, 2H, 2xCH), 5.75-5.81 (m, 2H, 2xCH), 5.45-5.57 (m, 2H, 2xCH), 4.25 (t, J=6.4Hz, 1H, CH), 4.12 (t, J=5.2 Hz, 1H, CH), 3.95 (m, 4H, 2xCH<sub>2</sub>), 2.63 (t, J=5.4Hz, 1H, CH), 2.43 (q, J=8.0 Hz, 2H, CH<sub>2</sub>), 2.07 (m, 3H, NH & CH<sub>2</sub>), 1.83 (m, 4H, 2xCH<sub>2</sub>), 1.69 (t, J=6.9 Hz, 10H, 2xCH<sub>3</sub> & 2xCH<sub>2</sub>), 1.23- 1.28 (s, 28H, 11xCH<sub>2</sub> & 2xCH<sub>3</sub>), 1.03 (t, J=7.2 Hz, 3H, CH<sub>3</sub>), 0.89 (t, J=7.2 Hz, 6H, 2xCH<sub>3</sub>); LC-MS (ES-TOF<sup>+</sup>) *m/z*: 802.65 (M<sup>+</sup>).

**Compound 2b:** <sup>1</sup>H NMR (CD<sub>3</sub>OD, 600 MHz):  $\tau$ /ppm 8.51 (s, 1H, NH), 8.00 (d, J=13.2 Hz, 2H, 2xCH), 7.36 (d, J=7.2 Hz, 2H, Ar-H), 7.32 (t, J=7.6 Hz, 2H, Ar-H), 7.07 (t, J=8.8 Hz, 4H, Ar-H), 5.83 (d, J=13.2 Hz, 2H, 2xCH), 5.75-5.79 (m, 2H, 2xCH), 5.49-5.56 (m, 2H, 2xCH), 4.56 (s, 3H, CH<sub>3</sub>), 4.25 (t, J=6.4Hz, 1H, CH), 4.14 (t, J=5.2 Hz, 1H, CH), 3.99 (t, J=6.8 Hz, 2H, CH<sub>2</sub>), 3.46 (s, 3H, CH<sub>3</sub>), 2.60 (t, J=5.4Hz, 1H, CH), 2.42 (q, J=8.0 Hz, 2H, CH<sub>2</sub>), 2.06 (m, 3H, NH & CH<sub>2</sub>), 1.85 (t, J=6.8 Hz, 2H, CH<sub>2</sub>), 1.65 (t, J=6.9 Hz, 6H, 2xCH<sub>3</sub>), 1.28- 1.35 (s, 28H, 11xCH<sub>2</sub> & 2xCH<sub>3</sub>), 0.94 (t, J=7.2 Hz, 3H, CH<sub>3</sub>); LC-MS (ES-TOF<sup>+</sup>) *m/z*: 746.56 (M<sup>+</sup>).
